# Supplementary material
Source: PubMed Central journal article supplement (PMC7847837)
Supplement: 40345_2020_208_MOESM1_ESM.pdf [file 40345_2020_208_MOESM1_ESM.pdf]

**Additional file 1:**

**Table S1. Characteristics of individuals with bipolar disorder by different treatment**

**Title**

Respiratory infections during lithium and valproate medication: a within-individual prospective study of 50,000 patients with bipolar disorder

**Authors**

Mikael Landén, M.D., Ph.D., Henrik Larsson, Ph.D., Paul Lichtenstein, Ph.D., Johan Westin, M.D., Ph.D., Jie Song, Ph.D.

**Correspondence**

Mikael Landén, Section of psychiatry, Sahlgrenska University hospital, Blå Stråket 15, 413 45 Gothenburg, Sweden. E-mail: [mikael.landen@gu.se](mailto:mikael.landen@gu.se)

**Table 1.** Characteristics of individuals with bipolar disorder by different treatment

|                                                              | <b>Lithium only</b> | <b>Valproate only</b> | <b>Both lithium and valproate<sup>c</sup></b> |
|--------------------------------------------------------------|---------------------|-----------------------|-----------------------------------------------|
| N                                                            | 17,777              | 5,925                 | 6,178                                         |
| Average birth year (SD)                                      | 1958 (18.8)         | 1964 (17.8)           | 1964 (16.4)                                   |
| Sex (% male)                                                 | 39.3                | 42.6                  | 41.4                                          |
| <b><i>Psychiatric comorbidities</i></b>                      |                     |                       |                                               |
| ADHD <sup>a</sup> (%)                                        | 8.2                 | 18.3                  | 15.8                                          |
| Eating disorders (%)                                         | 2.8                 | 4.1                   | 4.2                                           |
| ASD <sup>a</sup> (%)                                         | 2.6                 | 5.5                   | 4.5                                           |
| Anxiety disorders (%)                                        | 34.7                | 47.1                  | 44.5                                          |
| Personality disorders (%)                                    | 14.8                | 23.8                  | 23.3                                          |
| Alcohol abuse (%)                                            | 15.8                | 25.2                  | 23.6                                          |
| Drug abuse (%)                                               | 13.1                | 22.6                  | 23.0                                          |
| Suicide-related events (%)                                   | 16.5                | 20.9                  | 25.3                                          |
| <b><i>Concomitant psychotropic treatment<sup>b</sup></i></b> |                     |                       |                                               |
| Antidepressants (%)                                          | 75.3                | 83.2                  | 83.2                                          |
| Anticonvulsants (%)                                          | 23.0                | 31.7                  | 39.2                                          |
| Antipsychotics (%)                                           | 67.2                | 75.5                  | 89.3                                          |
| Lamotrigine (%)                                              | 38.3                | 41.7                  | 53.2                                          |
| Benzodiazepines (%)                                          | 55.6                | 59.8                  | 70.4                                          |

a) Abbreviations: ADHD, attention-deficit/hyperactivity disorder; ASD, autism spectrum disorders. b) Drugs are defined with Anatomical Therapeutic Chemical (ATC) classification codes: lamotrigine (N03AX09), antipsychotics (N05A) excluding lithium, antidepressants (N06A), anticonvulsants (N03A) excluding lamotrigine and valproate and benzodiazepines (N05BA). c) Individuals with both lithium and valproate were those who were ever treated with lithium and valproate during the study period, not necessarily at the same time.
